# Supplementary material for: Improved Thermoelectric Properties and Environmental Stability of Conducting PEDOT:PSS Films Post-treated With Imidazolium Ionic Liquids
Source: PubMed Central journal article supplement (PMC6960405; doi:10.3389/fchem.2019.00870), 2020-01-08
Supplement: Table_1.pdf [file Table_1.pdf]

## Supplementary Material

### Improved thermoelectric properties and environmental stability of conducting PEDOT:PSS films post-treated with imidazolium ionic liquids

Temesgen Atnafu Yemata<sup>1,2</sup>, Yun Zheng<sup>1</sup>, Aung Ko Ko Kyaw<sup>1,3</sup>, Xizu Wang<sup>1</sup>, Jing Song<sup>1</sup>, Wee Shong Chin<sup>2\*</sup>, and Jianwei Xu<sup>1,2\*</sup>

<sup>1</sup>Institute of Materials Research and Engineering; Agency for Science, Technology, and Research (A\*STAR), 2 Fusionopolis Way, Singapore 138634, Republic of Singapore

<sup>2</sup>Department of Chemistry, National University of Singapore, 3 Science Drive 3, Singapore 117543, Republic of Singapore

<sup>3</sup>Department of Electrical and Electronic Engineering, Southern University of Science and Technology, Shenzhen 518055, P.R. China

\* Correspondence:

[jw-xu@imre.a-star.edu.sg](mailto:jw-xu@imre.a-star.edu.sg) (J. Xu) and [chmcws@nus.edu.sg](mailto:chmcws@nus.edu.sg) (W. S. Chin)

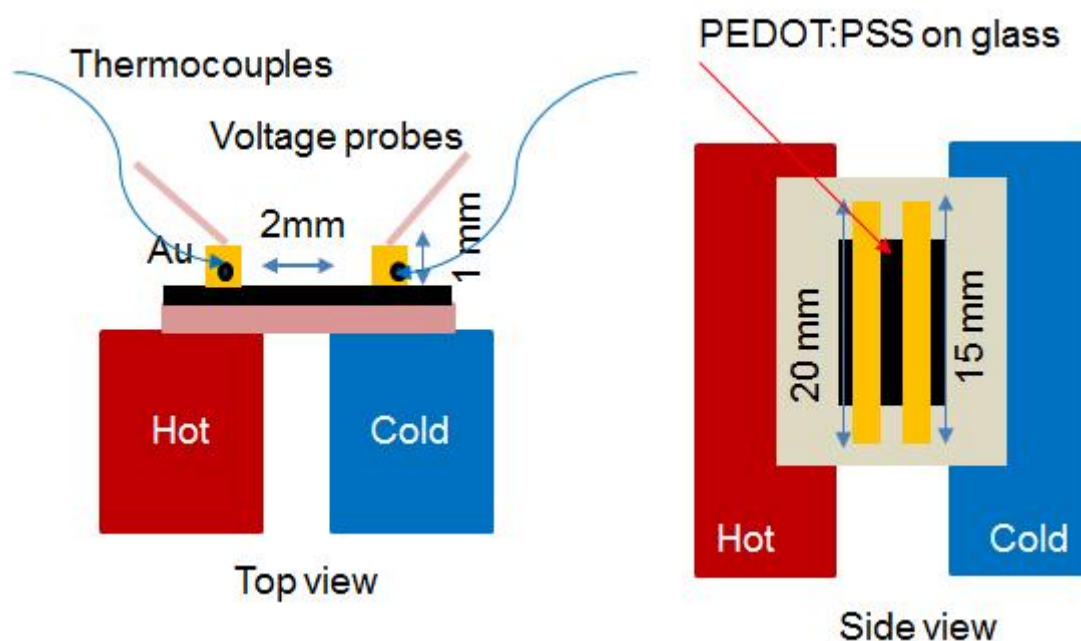

**Figure S1.** TE characterization of the PEDOT:PSS films. Schematic illustration of the  $S$  measurement setup and detailed electrode geometry.

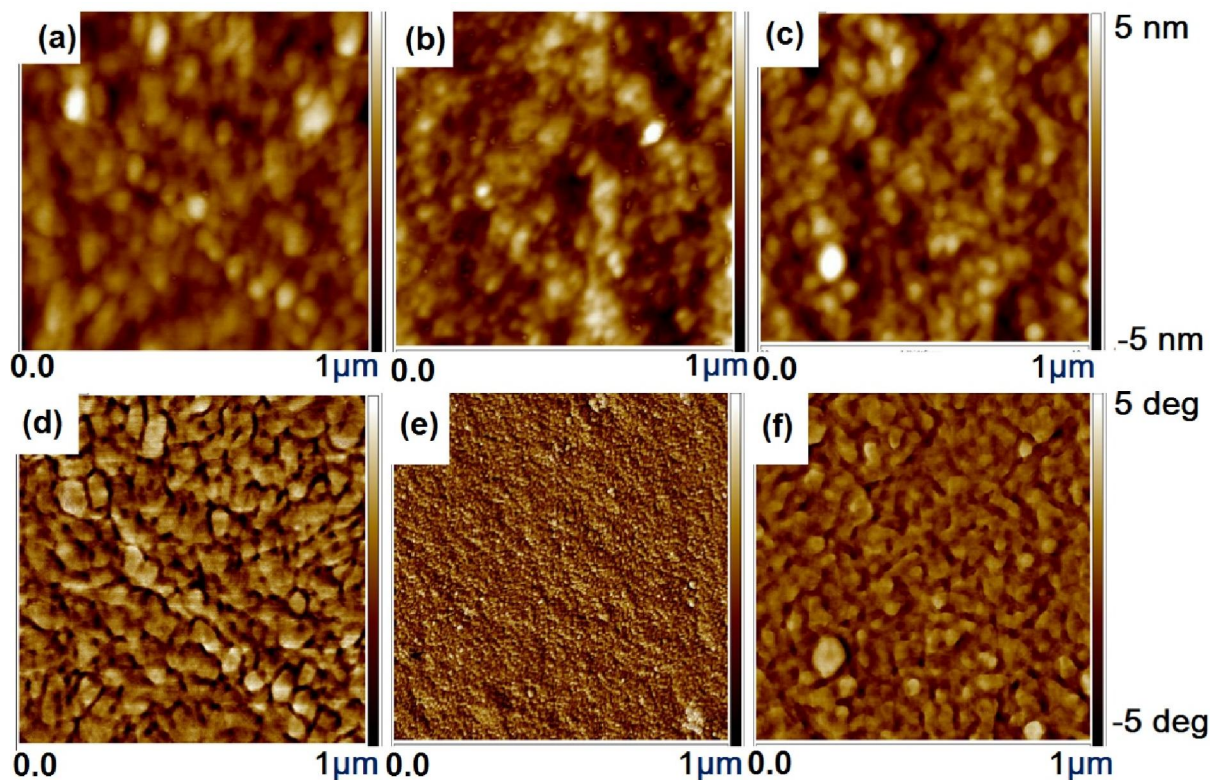

**Figure S2.** The AFM surface morphology of pristine and SFS-F-PEDOT:PSS films at various concentration SFS in water. Height images: (a) pristine, (b) 0, and (c) 100 mM SFS in water. Phase images: (d) pristine, (e) 0, and (f) 100 mM SFS in water. The area scanned is  $1 \times 1 \mu\text{m}^2$  for each image.

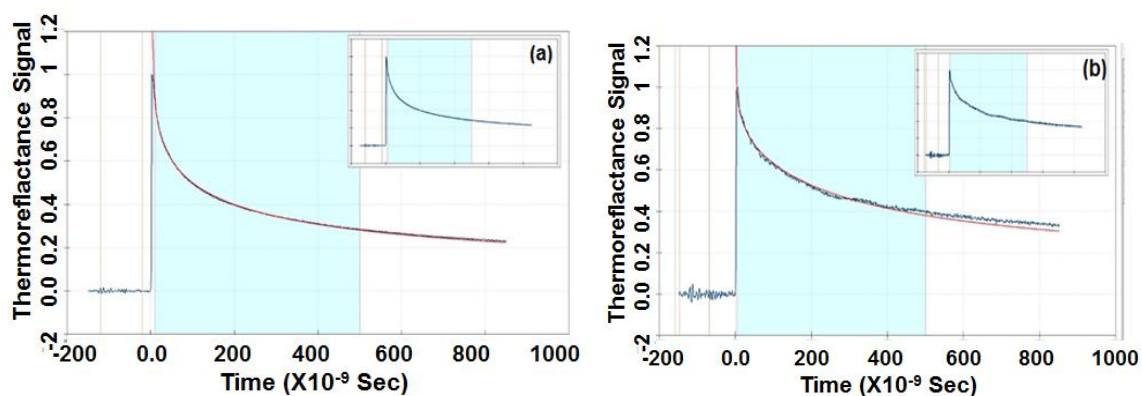

**Figure S3.** The normalized thermal reflectance signals of pristine and BMIM-TFSI-SFS-F-PEDOT:PSS films coated with 100 nm-thick-Al after the nanosecond-pulse heating. (a) Pristine and (b) 40 vol.% BMIM-TFSI-SFS-F-PEDOT:PSS films. The  $b$  of the PEDOT:PSS

films are extracted from the fitted temperature response curve which is represented with the solid red lines.

**Table S1.** Thermoelectric properties ( $\sigma$ ,  $S$  and  $PF$ ) of the sequential formamide (three times) and 100 mM SFS pre-treated films at various vol.% BMIM-TFSI in methanol.

| Vol.% BMIM-TFSI-SFS-F-<br>PEDOT:PSS | $\sigma$ (S/cm) | $S$ ( $\mu$ V/K) | $PF$ ( $\mu$ W/mK <sup>2</sup> ) |
|-------------------------------------|-----------------|------------------|----------------------------------|
| 0                                   | 693.01 $\pm$ 7  | 51.78 $\pm$ 0.8  | 185.77 $\pm$ 4.3                 |
| 20                                  | 645.9 $\pm$ 6   | 60.44 $\pm$ 0.5  | 235.9 $\pm$ 4.3                  |
| 40                                  | 641 $\pm$ 5     | 61.09 $\pm$ 0.7  | 239.2 $\pm$ 4.5                  |
| 60                                  | 635.1 $\pm$ 7   | 60.7 $\pm$ 0.6   | 234 $\pm$ 5.5                    |
| 80                                  | 633.2 $\pm$ 5   | 60.81 $\pm$ 0.8  | 234.1 $\pm$ 5.1                  |
| 100                                 | 631.3 $\pm$ 4   | 60.56 $\pm$ 0.6  | 231.5 $\pm$ 4.5                  |

**Table S2.** Comparison of this work with previous reports in the literature on some typical sequential treated PEDOT based TE materials

| Ref.                   | Dedoping Treatment                                                                                                            | $\sigma$<br>(S/cm) | $S$ ( $\mu$ V/<br>K) | $PF$<br>( $\mu$ W/K <sup>2</sup> m) | $k$<br>(W/mK) | $ZT$  |
|------------------------|-------------------------------------------------------------------------------------------------------------------------------|--------------------|----------------------|-------------------------------------|---------------|-------|
| (Bubnova et al., 2011) | PEDOT:TOS dedoping with TDAE (C <sub>10</sub> H <sub>24</sub> N <sub>4</sub> )                                                | 67                 | 220                  | 324                                 | -             | -     |
| (Park et al., 2014)    | PEDOT:PSS treated with a mixture of DMSO and hydrazine                                                                        | 578                | 67                   | 112                                 | -             | -     |
| (Yi et al., 2015)      | Addition of DMSO in to PEDOT:PSS and then treated with Poly(ethylene oxide)                                                   | 1061               | 38.4                 | 157.35                              | -             | -     |
| (Lee et al., 2014b)    | PEDOT:PSS treated with DMSO (C <sub>2</sub> H <sub>6</sub> OS), then DMSO and hydrazine (N <sub>2</sub> H <sub>4</sub> )      | 677                | 41                   | 115.48                              | 0.17          | 0.2   |
| (Wang et al., 2015)    | PEDOT:PSS treated with DMSO/NaBH <sub>4</sub>                                                                                 | ~580               | ~40                  | 98.1                                | 0.451         | 0.064 |
| (Lee et al., 2014a)    | PEDOT:PSS treated with p-toluenesulfonic acid monohydrate (C <sub>7</sub> H <sub>8</sub> O <sub>3</sub> S · H <sub>2</sub> O) | ~1300              | ~50                  | 318.4                               | 0.3           | 0.31  |

, then hydrazine (N<sub>2</sub>H<sub>4</sub>)  
/DMSO solution

|                    |                                                                                                                                    |      |      |       |      |      |
|--------------------|------------------------------------------------------------------------------------------------------------------------------------|------|------|-------|------|------|
| (Fan et al., 2017) | PEDOT:PSS treated with H <sub>2</sub> SO <sub>4</sub> , then NaOH                                                                  | 2170 | 39.2 | 334   | -    | -    |
| This work          | PEDOT:PSS treated with formamide (HCONH <sub>2</sub> ), then SFS ( CH <sub>3</sub> NaO <sub>3</sub> S) and then 40 Vol.% BMIM-TFSI | 641  | 61.1 | 239.2 | 0.27 | 0.26 |

## References

- Bubnova, O., Khan, Z.U., Malti, A., Braun, S., Fahlman, M., Berggren, M., and Crispin, X. (2011). Optimization of the thermoelectric figure of merit in the conducting polymer poly (3, 4-ethylenedioxythiophene). *Nat. Mater.* 10, 429.
- Fan, Z., Li, P., Du, D., and Ouyang, J. (2017). Significantly Enhanced Thermoelectric Properties of PEDOT: PSS Films through Sequential Post - Treatments with Common Acids and Bases. *Adv. Energy Mater.* 7, 1602116.
- Lee, S.H., Park, H., Kim, S., Son, W., Cheong, I.W., and Kim, J.H. (2014a). Transparent and flexible organic semiconductor nanofilms with enhanced thermoelectric efficiency. *J. Mater. Chem. A* 2, 7288-7294.
- Lee, S.H., Park, H., Son, W., Choi, H.H., and Kim, J.H. (2014b). Novel solution-processable, dedoped semiconductors for application in thermoelectric devices. *J. Mater. Chem. A* 2, 13380-13387.
- Park, H., Lee, S.H., Kim, F.S., Choi, H.H., Cheong, I.W., and Kim, J.H. (2014). Enhanced thermoelectric properties of PEDOT: PSS nanofilms by a chemical dedoping process. *J. Mater. Chem. A* 2, 6532-6539.
- Wang, J., Cai, K., and Shen, S. (2015). A facile chemical reduction approach for effectively tuning thermoelectric properties of PEDOT films. *Org. Electron.* 17, 151-158.
- Yi, C., Wilhite, A., Zhang, L., Hu, R., Chuang, S.S., Zheng, J., and Gong, X. (2015). Enhanced thermoelectric properties of poly (3, 4-ethylenedioxythiophene): poly (styrenesulfonate) by binary secondary dopants. *ACS Appl. Mater. Interfaces* 7, 8984-8989.
